# Supplementary material for: Development of flexible shifts in control modes and its relationship with academic achievement
Source: Frontiers journal article supplement (doi:10.3389/fdpys.2024.1435912), 2024-08-22
Supplement: Table_2.docx [file Table_2.docx]

**Appendix A**

Table A1

Mean and standard deviation of each condition and trial type by age group for Reaction Time and Error Rate analysis.

| **Condition** | **Trial Type** | **Group** | **N** | **Mean RT** | **SD** | **Mean Error Rate** | **SD** |
| --- | --- | --- | --- | --- | --- | --- | --- |
| Proactive Impossible Condition | Switch | 5 years | 30 | 7.917 | 0.153 | 0.117 | 0.114 |
|  |  | 6-8 years | 31 | 7.649 | 0.194 | 0.05 | 0.069 |
|  |  | 9-11 years | 33 | 7.497 | 0.214 | 0.036 | 0.048 |
|  | Repeat | 5 years | 30 | 7.87 | 0.139 | 0.046 | 0.032 |
|  |  | 6-8 years | 31 | 7.613 | 0.19 | 0.022 | 0.029 |
|  |  | 9-11 years | 33 | 7.51 | 0.218 | 0.015 | 0.026 |
| Proactive Possible Condition | Switch | 5 years | 30 | 7.924 | 0.319 | 0.093 | 0.112 |
|  |  | 6-8 years | 31 | 7.529 | 0.187 | 0.05 | 0.072 |
|  |  | 9-11 years | 33 | 7.346 | 0.201 | 0.045 | 0.061 |
|  | Repeat | 5 years | 30 | 7.896 | 0.295 | 0.042 | 0.048 |
|  |  | 6-8 years | 31 | 7.534 | 0.205 | 0.02 | 0.023 |
|  |  | 9-11 years | 33 | 7.363 | 0.204 | 0.013 | 0.024 |
| Proactive Encouraged Condition | Switch | 5 years | 30 | 7.708 | 0.228 | 0.287 | 0.187 |
|  |  | 6-8 years | 31 | 7.442 | 0.193 | 0.127 | 0.121 |
|  |  | 9-11 years | 33 | 7.29 | 0.202 | 0.058 | 0.069 |
|  | Repeat | 5 years | 30 | 7.685 | 0.19 | 0.102 | 0.079 |
|  |  | 6-8 years | 31 | 7.434 | 0.183 | 0.05 | 0.051 |
|  |  | 9-11 years | 33 | 7.292 | 0.178 | 0.026 | 0.027 |

Note: All RTs were log-transformed to control age-related differences. Participants with error rates less than 25% were included for Reaction Time and Error Rate analysis.

Table A2

Mean and standard deviation of each condition by age group for IES analysis.

| **Condition** | **Group** | **N** | **Mean** | **SD** |
| --- | --- | --- | --- | --- |
| Proactive Impossible Condition | 5 years | 20 | 0.43 | 0.676 |
|  | 6-8 years | 29 | 0.234 | 0.525 |
|  | 9-11 years | 33 | 0.17 | 0.372 |
| Proactive Possible Condition | 5 years | 20 | 0.534 | 1.217 |
|  | 6-8 years | 29 | 0.147 | 0.371 |
|  | 9-11 years | 33 | 0.266 | 0.535 |
| Proactive Encouraged Condition | 5 years | 20 | 1.491 | 1.676 |
|  | 6-8 years | 29 | 0.916 | 1.29 |
|  | 9-11 years | 33 | 0.292 | 0.67 |

Note: All RTs were log-transformed to control age-related differences. Participants with error rates of less than 10% were included in the IES analysis.

Table A3

Mean and standard deviation of each condition and trial type by age group for LISAS analysis.

| **Condition** | **Trial Type** | **Group** | **N** | **Mean Scores** | **SD** |
| --- | --- | --- | --- | --- | --- |
| Proactive Impossible Condition | Switch | 5 years | 30 | 8.001 | 0.175 |
|  |  | 6-8 years | 31 | 7.689 | 0.188 |
|  |  | 9-11 years | 33 | 7.526 | 0.222 |
|  | Repeat | 5 years | 30 | 7.921 | 0.14 |
|  |  | 6-8 years | 31 | 7.638 | 0.184 |
|  |  | 9-11 years | 33 | 7.528 | 0.215 |
| Proactive Possible Condition | Switch | 5 years | 30 | 7.998 | 0.323 |
|  |  | 6-8 years | 31 | 7.576 | 0.198 |
|  |  | 9-11 years | 33 | 7.394 | 0.221 |
|  | Repeat | 5 years | 30 | 7.945 | 0.293 |
|  |  | 6-8 years | 31 | 7.566 | 0.205 |
|  |  | 9-11 years | 33 | 7.385 | 0.209 |
| Proactive Encouraged Condition | Switch | 5 years | 30 | 7.891 | 0.27 |
|  |  | 6-8 years | 31 | 7.531 | 0.232 |
|  |  | 9-11 years | 33 | 7.339 | 0.219 |
|  | Repeat | 5 years | 30 | 7.776 | 0.202 |
|  |  | 6-8 years | 31 | 7.489 | 0.191 |
|  |  | 9-11 years | 33 | 7.325 | 0.188 |

Note: All RTs were log-transformed to control age-related differences. Participants with error rates less than 25% were included for LISAS analysis.
